# Supplementary material for: Association between Dietary Phenolic Acids and Hypertension in a Mediterranean Cohort
Source: MDPI journal article supplement (doi:10.3390/nu9101069), 2017-09-27
Supplement: s1 [file s1]

Supplementary Table S1. Dietary intake of major micro- and macro-nutrients by quartiles of dietary phenolic acids in the MEAL study sample (n = 1,936).

|                                        | Phenolic acid intake      |                           |                            |                             |
|----------------------------------------|---------------------------|---------------------------|----------------------------|-----------------------------|
|                                        | Q1                        | Q2                        | Q3                         | Q4                          |
| Energy intake (kcal/d), median (range) | 1664.50 (1001, 3888)      | 1935 (1031, 4766)         | 1980 (1010, 5064)          | 2356 (1028, 5877)           |
| Macronutrients                         |                           |                           |                            |                             |
| Carbohydrates (g/d), median (range)    | 238.17 (100.17, 673.96)   | 276.52 (119.10, 639.65)   | 278.70 (115.51, 649.26)    | 308.98 (120.49, 897.75)     |
| Fiber (g/d), median (range)            | 22.73 (6.62, 65.51)       | 27.82 (2.81, 78.07)       | 31.99 (7.60, 85.11)        | 35.03 (11.06, 150.50)       |
| Protein (g/d), median (range)          | 69.88 (32.65, 155.77)     | 80.08 (29.26, 242.17)     | 81.80 (38.32, 180.06)      | 88.84 (37.16, 332.65)       |
| Fat (g/d), median (range)              |                           |                           |                            |                             |
| Cholesterol (mg/d), median (range)     | 160.20 (63.02, 468.55)    | 166.45 (56.92, 837.53)    | 164.81 (18.17, 517.35)     | 206.67 (17.28, 921.06)      |
| SFA, median (range)                    | 18.67 (8.80, 61.79)       | 21.19 (8.61, 80.44)       | 21.53 (6.48, 74.25)        | 27.17 (8.05, 76.40)         |
| MUFA, median (range)                   | 21.25 (9.19, 46.20)       | 22.84 (11.01, 60.82)      | 23.84 (7.28, 62.08)        | 29.24 (14.39, 93.84)        |
| PUFA, median (range)                   |                           |                           |                            |                             |
| Micronutrients                         |                           |                           |                            |                             |
| Vitamin A (Retinol), median (range)    | 621.44 (170.62, 1710.76)  | 738.88 (177.45, 2148.54)  | 844.28 (152.20, 2886.15)   | 947.77 (260.90, 4949.53)    |
| Vitamin C (mg/d), median (range)       | 102.11 (5.28, 334.45)     | 126.64 (6.03, 488.80)     | 149.15 (12.20, 700.31)     | 171.71 (34.49, 1097.79)     |
| Vitamin E (mg/d), median (range)       | 6.84 (1.85, 15.77)        | 7.64 (1.47, 21.89)        | 8.50 (3.50, 22.08)         | 9.62 (4.36, 31.93)          |
| Vitamin B12, median (range)            | 5.15 (1.50, 13.39)        | 5.09 (1.49, 45.10)        | 5.62 (0.57, 27.49)         | 6.23 (2.23, 120.52)         |
| Vitamin D, median (range)              | 3.69 (0.64, 15.77)        | 3.55 (0.59, 51.00)        | 4.36 (0.20, 24.90)         | 4.56 (0.50, 56.41)          |
| Sodium (mg/d), median (range)          | 2556.32 (876.09, 5858.59) | 2652.79 (796.59, 8858.45) | 2692.49 (737.51, 9469.50)  | 2941.89 (829.25, 8646.17)   |
| Potassium (mg/d), median (range)       | 2765.40 (872.14, 6209.83) | 3389.39 (812.56, 7419.57) | 3741.26 (1617.07, 8842.85) | 4073.51 (1576.99, 15693.66) |
| Magnesium, median (range)              | 300.75 (147.59, 687.34)   | 369.72 (109.84, 778.09)   | 401.61 (170.38, 937.40)    | 439.31 (149.57, 1665.14)    |

|                         |                          |                          |                          |                          |
|-------------------------|--------------------------|--------------------------|--------------------------|--------------------------|
| Calcium, median (range) | 639.66 (226.15, 2015.74) | 726.55 (169.71, 2163.39) | 737.29 (270.47, 1836.24) | 848.99 (224.52, 3109.93) |
|-------------------------|--------------------------|--------------------------|--------------------------|--------------------------|

Supplementary Table S2. Association between total, main classes and individual phenolic acids and hypertension, separately for men and women.

|                          | Phenolic acids quartiles, men |                   |                   |                   | Phenolic acids quartiles, women |                   |                   |                   |
|--------------------------|-------------------------------|-------------------|-------------------|-------------------|---------------------------------|-------------------|-------------------|-------------------|
|                          | Q1                            | Q2                | Q3                | Q4                | Q1                              | Q2                | Q3                | Q4                |
| Phenolic acids           |                               |                   |                   |                   |                                 |                   |                   |                   |
| No. of cases             | 101                           | 136               | 118               | 107               | 123                             | 142               | 139               | 110               |
| OR (95% CI) <sup>a</sup> | 1                             | 1.73 (1.10, 2.73) | 0.98 (0.64, 1.51) | 0.88 (0.55, 1.42) | 1                               | 1.45 (0.94, 2.25) | 1.07 (0.70, 1.64) | 0.75 (0.47, 1.19) |
| OR (95% CI) <sup>b</sup> | 1                             | 1.38 (0.78, 2.44) | 0.98 (0.55, 1.72) | 0.83 (0.43, 1.57) | 1                               | 1.08 (0.64, 1.80) | 0.70 (0.41, 1.18) | 0.59 (0.32, 1.07) |
| OR (95% CI) <sup>c</sup> | 1                             | 1.18 (0.62, 2.22) | 0.79 (0.41, 1.50) | 0.60 (0.29, 1.23) | 1                               | 1.01 (0.59, 1.73) | 0.54 (0.31, 0.93) | 0.59 (0.31, 1.11) |
| Hydroxybenzoic acids     |                               |                   |                   |                   |                                 |                   |                   |                   |
| No. of cases             | 105                           | 140               | 106               | 111               | 126                             | 142               | 135               | 111               |
| OR (95% CI) <sup>a</sup> | 1                             | 1.44 (0.91, 2.26) | 0.74 (0.48, 1.16) | 0.67 (0.43, 1.05) | 1                               | 1.67 (1.10, 2.55) | 1.62 (1.06, 2.49) | 0.96 (0.63, 1.47) |
| OR (95% CI) <sup>b</sup> | 1                             | 1.26 (0.74, 2.16) | 0.64 (0.35, 1.17) | 0.82 (0.46, 1.47) | 1                               | 1.48 (0.91, 2.42) | 1.05 (0.61, 1.79) | 1.04 (0.62, 1.77) |
| OR (95% CI) <sup>c</sup> | 1                             | 0.85 (0.48, 1.53) | 0.37 (0.19, 0.73) | 0.61 (0.32, 1.15) | 1                               | 1.42 (0.87, 2.33) | 1.07 (0.61, 1.87) | 1.11 (0.64, 1.90) |
| Hydroxycinnamic acid     |                               |                   |                   |                   |                                 |                   |                   |                   |
| No. of cases             | 106                           | 118               | 132               | 106               | 117                             | 143               | 135               | 119               |
| OR (95% CI) <sup>a</sup> | 1                             | 1.22 (0.80, 1.86) | 1.66 (1.06, 2.57) | 1.23 (0.78, 1.94) | 1                               | 0.69 (0.40, 1.18) | 0.42 (0.24, 0.72) | 0.40 (0.21, 0.74) |
| OR (95% CI) <sup>b</sup> | 1                             | 1.12 (0.65, 1.91) | 1.27 (0.71, 2.27) | 1.22 (0.64, 2.33) | 1                               | 0.75 (0.44, 1.28) | 0.45 (0.26, 0.78) | 0.44 (0.24, 0.80) |
| OR (95% CI) <sup>c</sup> | 1                             | 0.75 (0.41, 1.38) | 0.97 (0.52, 1.82) | 0.67 (0.32, 1.42) | 1                               | 0.65 (0.37, 1.13) | 0.41 (0.23, 0.73) | 0.35 (0.19, 0.66) |

|                          |     |                   |                   |                   |     |                   |                   |                   |
|--------------------------|-----|-------------------|-------------------|-------------------|-----|-------------------|-------------------|-------------------|
| Hydroxyphenylacetic acid |     |                   |                   |                   |     |                   |                   |                   |
| No. of cases             | 78  | 141               | 110               | 133               | 148 | 123               | 138               | 105               |
| OR (95% CI) <sup>a</sup> | 1   | 1.65 (1.04, 2.62) | 0.83 (0.52, 1.31) | 1.20 (0.74, 1.95) | 1   | 0.97 (0.64, 1.47) | 1.56 (1.03, 2.37) | 0.84 (0.55, 1.30) |
| OR (95% CI) <sup>b</sup> | 1   | 1.22 (0.67, 2.20) | 0.71 (0.39, 1.28) | 1.09 (0.55, 2.16) | 1   | 0.87 (0.53, 1.42) | 1.29 (0.76, 2.18) | 0.46 (0.24, 0.87) |
| OR (95% CI) <sup>c</sup> | 1   | 0.95 (0.49, 1.82) | 0.52 (0.27, 1.00) | 0.71 (0.33, 1.49) | 1   | 0.77 (0.47, 1.28) | 1.17 (0.67, 2.04) | 0.44 (0.23, 0.84) |
| Caffeic acid             |     |                   |                   |                   |     |                   |                   |                   |
| No. of cases             | 110 | 112               | 123               | 117               | 133 | 117               | 127               | 137               |
| OR (95% CI) <sup>a</sup> | 1   | 0.63 (0.40, 0.98) | 0.85 (0.54, 1.34) | 0.70 (0.43, 1.15) | 1   | 0.60 (0.39, 0.92) | 0.67 (0.44, 1.03) | 1.06 (0.67, 1.65) |
| OR (95% CI) <sup>b</sup> | 1   | 0.87 (0.48, 1.60) | 0.97 (0.51, 1.84) | 0.46 (0.19, 1.06) | 1   | 0.89 (0.52, 1.53) | 0.89 (0.50, 1.55) | 1.19 (0.58, 2.43) |
| OR (95% CI) <sup>c</sup> | 1   | 0.77 (0.40, 1.49) | 0.86 (0.44, 1.69) | 0.20 (0.07, 0.52) | 1   | 0.84 (0.49, 1.46) | 0.77 (0.44, 1.34) | 1.39 (0.65, 2.97) |
| Cinnamic acid            |     |                   |                   |                   |     |                   |                   |                   |
| No. of cases             | 98  | 99                | 118               | 147               | 148 | 140               | 102               | 124               |
| OR (95% CI) <sup>a</sup> | 1   | 0.60 (0.38, 0.95) | 0.95 (0.59, 1.53) | 0.95 (0.60, 1.51) | 1   | 1.00 (0.66, 1.51) | 0.78 (0.51, 1.21) | 0.86 (0.56, 1.31) |
| OR (95% CI) <sup>b</sup> | 1   | 0.39 (0.22, 0.69) | 0.52 (0.28, 0.95) | 0.82 (0.45, 1.48) | 1   | 0.85 (0.53, 1.37) | 0.50 (0.29, 0.84) | 0.77 (0.46, 1.28) |
| OR (95% CI) <sup>c</sup> | 1   | 0.35 (0.19, 0.65) | 0.51 (0.26, 1.02) | 0.73 (0.38, 1.41) | 1   | 0.75 (0.46, 1.23) | 0.45 (0.25, 0.78) | 0.74 (0.43, 1.26) |
| Vanillic acid            |     |                   |                   |                   |     |                   |                   |                   |
| No. of cases             | 98  | 141               | 126               | 97                | 141 | 122               | 112               | 139               |

|                          |   |                   |                   |                   |     |                   |                   |                   |
|--------------------------|---|-------------------|-------------------|-------------------|-----|-------------------|-------------------|-------------------|
| OR (95% CI) <sup>a</sup> | 1 | 1.33 (0.85, 2.08) | 0.74 (0.48, 1.16) | 0.87 (0.53, 1.43) | 1   | 1.14 (0.74, 1.74) | 1.02 (0.67, 1.57) | 0.99 (0.65, 1.50) |
| OR (95% CI) <sup>b</sup> | 1 | 1.40 (0.78, 2.50) | 0.69 (0.38, 1.26) | 0.78 (0.38, 1.58) | 1   | 0.95 (0.56, 1.60) | 1.11 (0.65, 1.89) | 0.81 (0.46, 1.42) |
| OR (95% CI) <sup>c</sup> | 1 | 1.39 (0.73, 2.65) | 0.61 (0.31, 1.17) | 0.52 (0.24, 1.15) | 1   | 0.92 (0.54, 1.59) | 1.17 (0.68, 2.03) | 0.84 (0.47, 1.49) |
| Ferulic acid             |   |                   |                   |                   |     |                   |                   |                   |
| No. of cases             | 1 | 126               | 148               | 77                | 133 | 122               | 131               | 128               |
| OR (95% CI) <sup>a</sup> | 1 | 0.89 (0.58, 1.38) | 1.25 (0.81, 1.94) | 0.75 (0.45, 1.25) | 1   | 0.82 (0.54, 1.27) | 0.91 (0.60, 1.40) | 0.66 (0.43, 1.03) |
| OR (95% CI) <sup>b</sup> | 1 | 1.38 (0.79, 2.39) | 1.23 (0.71, 2.13) | 0.89 (0.46, 1.73) | 1   | 0.93 (0.53, 1.61) | 1.41 (0.83, 2.39) | 0.77 (0.43, 1.35) |
| OR (95% CI) <sup>c</sup> | 1 | 1.39 (0.77, 2.49) | 1.64 (0.89, 3.00) | 0.96 (0.47, 1.98) | 1   | 0.86 (0.49, 1.51) | 1.64 (0.96, 2.81) | 0.76 (0.43, 1.36) |

<sup>a</sup> Model 1 adjusted for age (years, continuous), energy intake (kcal/d, continuous).

<sup>b</sup> Model 2 = Model 1 + body mass index, smoking status (smokers, ex-smokers, non-smokers), alcohol consumption (0 g/d, <12 g/d, ≥12 g/d), physical activity level (low, medium, high), educational level (low, medium, high), occupational level (unemployed, low, medium, high), menopausal status (in women), fiber, sodium, potassium, magnesium, and calcium intake.

<sup>c</sup> Model 3 = Model 2 + adherence to the Mediterranean diet.
